# Supplementary material for: Importance of Primary and Secondary Hydrogen Bonding Interactions of Polyols on the Plasticization of Chitosan
Source: PubMed Central journal article supplement (PMC11465282; doi:10.1021/acsomega.4c05696), 2024-09-24
Supplement: ao4c05696_si_001.pdf [file ao4c05696_si_001.pdf]

# Supporting Information

## **The Importance of Primary and Secondary Hydrogen Bonding Interactions of Polyols on the Plasticization of Chitosan**

Seth W. Mars, Brandy L. Davidson, Kayla H. Moore, Brycelyn M. Boardman,<sup>‡\*</sup> and Gretchen M. Peters<sup>‡\*</sup>

Department of Chemistry and Biochemistry, James Madison University, Harrisonburg, Virginia 22807, United States

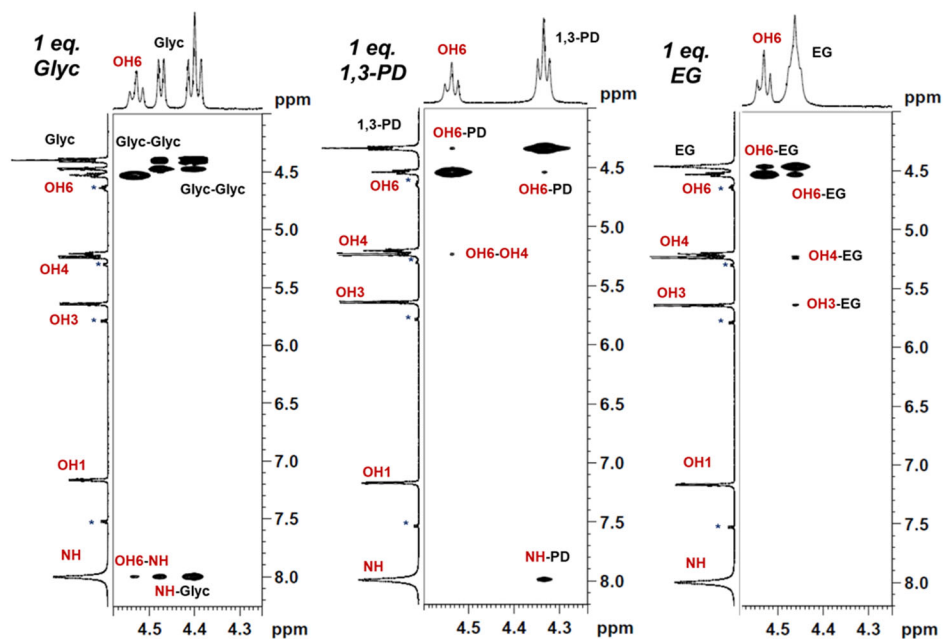

**Figure S1.** Representative cross sections of the 2D NOESY spectra of the polyol OH's at 12.5 mM GlcN and 12.5 mM Glyc (left), 12.5 mM 1,3-PD (middle), or 12.5 mM EG (right) recorded at 400 MHz (9.4 T). Small peaks for the alpha anomer of GlcN are observed in the spectra, and the corresponding peaks are denoted with an asterisk (\*).

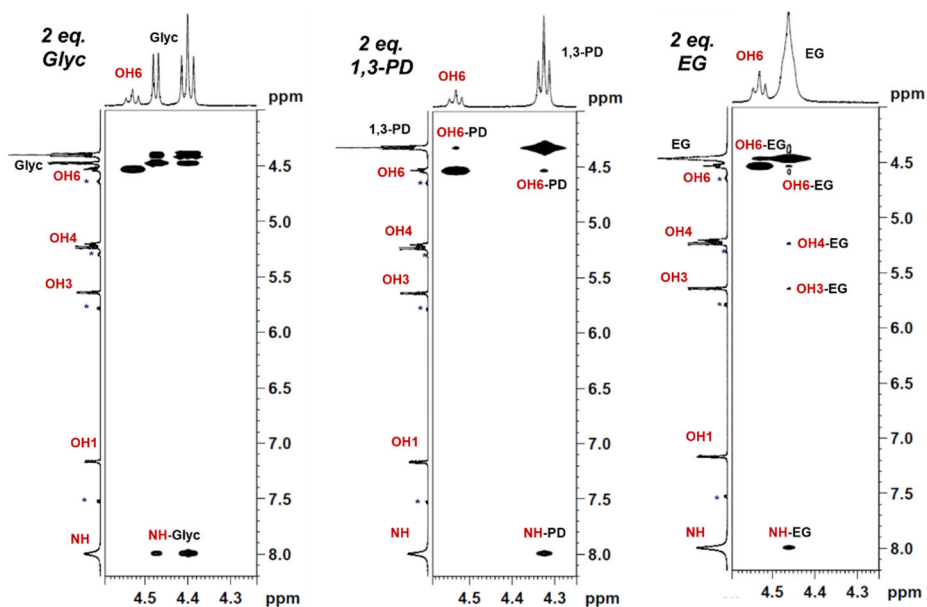

**Figure S2.** Representative cross sections of the 2D NOESY spectra of the polyol OH's at 12.5 mM GlcN and 25 mM Glyc (left), 25 mM 1,3-PD (middle), or 25 mM EG (right) recorded at 400 MHz (9.4 T). Small peaks for the alpha anomer of GlcN are observed in the spectra, and the corresponding peaks are denoted with an asterisk (\*).

**0.5 eq. Glyc**

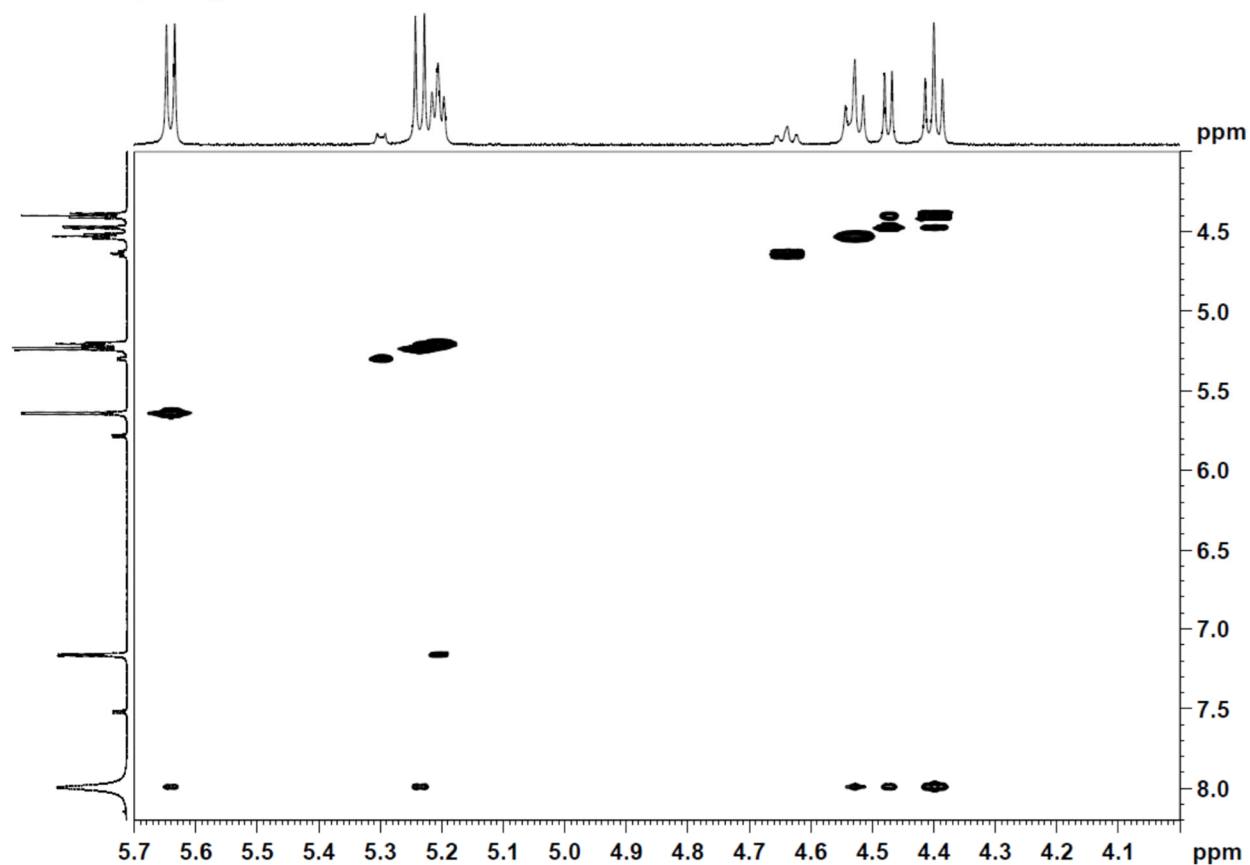

**Figure S3.** Full 2D NOESY spectra of 12.5 mM GlcN and 6.25 mM Glyc in d<sub>6</sub>-DMSO recorded at 400 MHz (9.4 T). Full 1D NMR spectrum can be found in Figure S17.

**Figure S3a.** We have previously reported the full 2D NOESY spectra of 12.5 mM GlcN and 12.5 mM Glyc in d<sub>6</sub>-DMSO recorded at 400 MHz (9.4 T) (*Smith, D.R, et. al. ACS Omega* **2021**, *6*, 39, 25227–25234).

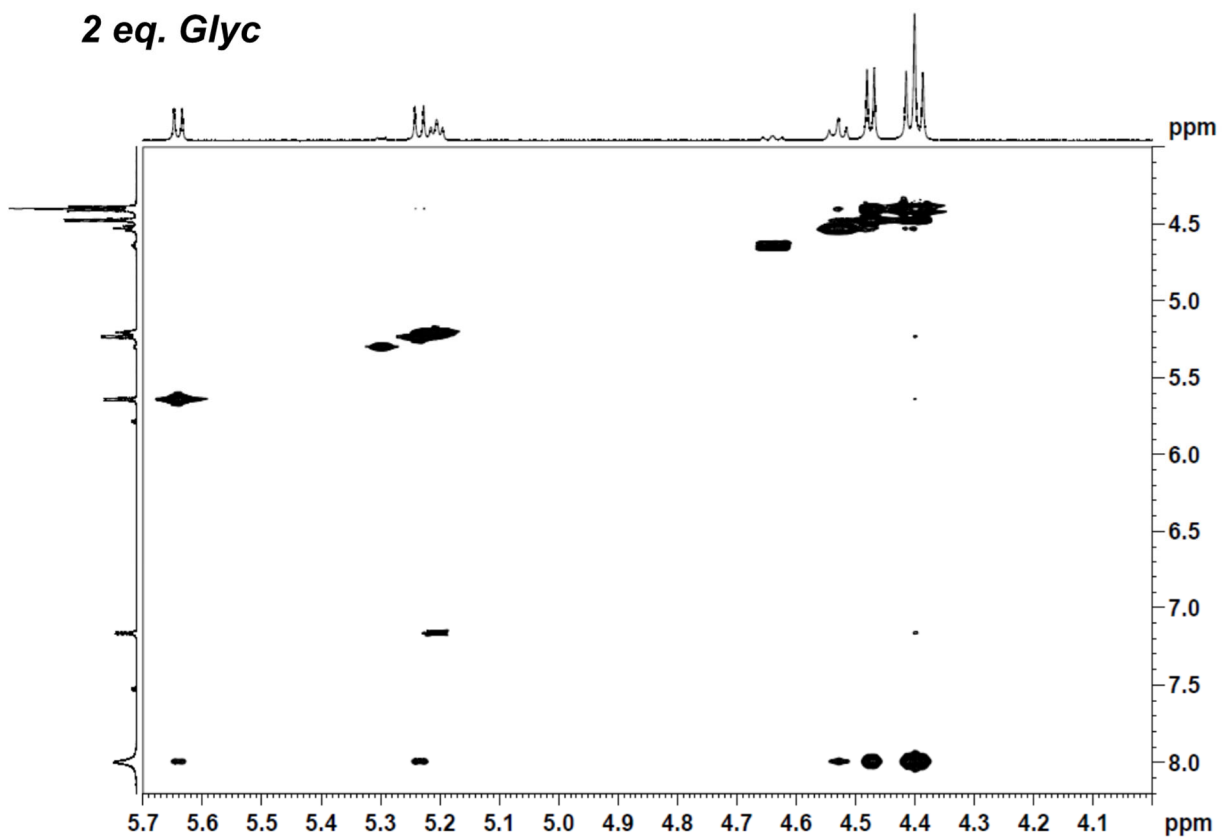

**Figure S4.** Full 2D NOESY spectra of 12.5 mM GlcN and 25 mM Glyc in d<sub>6</sub>-DMSO recorded at 400 MHz (9.4 T). Full 1D NMR spectrum can be found in Figure S18.

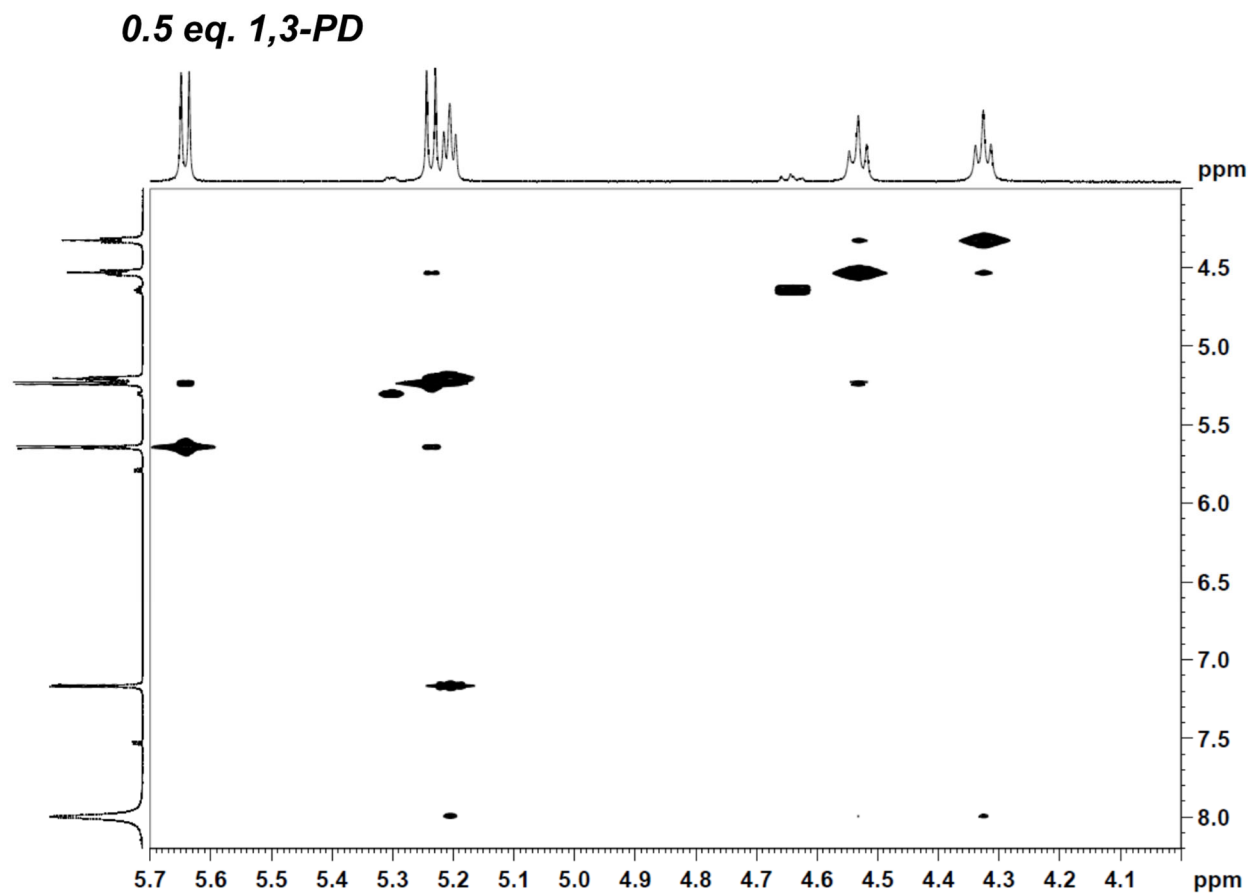

**Figure S5.** Full 2D NOESY spectra of 12.5 mM GlcN and 6.25 mM 1,3-PD in d<sub>6</sub>-DMSO recorded at 400 MHz (9.4 T). Full 1D NMR spectrum can be found in Figure S19.

**1 eq. 1,3-PD**

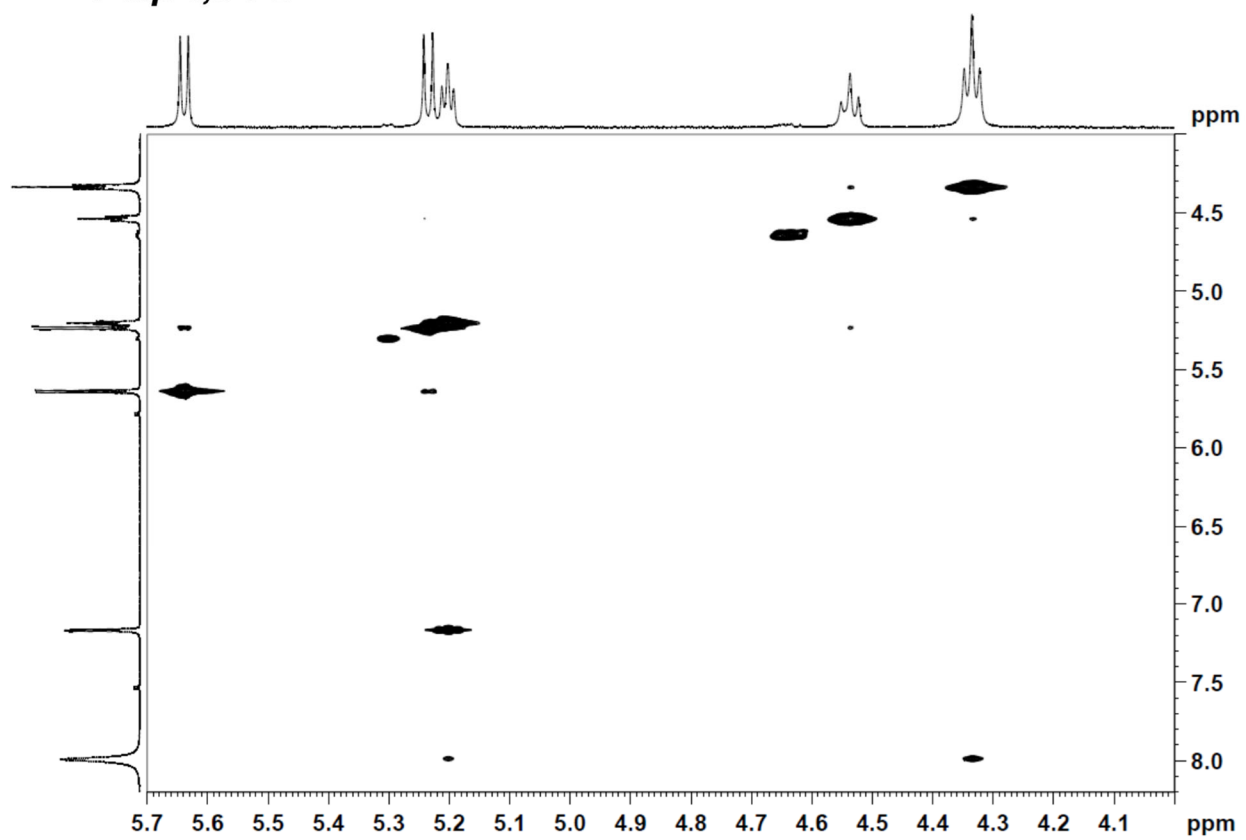

**Figure S6.** Full 2D NOESY spectra of 12.5 mM GlcN and 12.5 mM 1,3-PD in d<sub>6</sub>-DMSO recorded at 400 MHz (9.4 T). Full 1D NMR spectrum can be found in Figure S20.

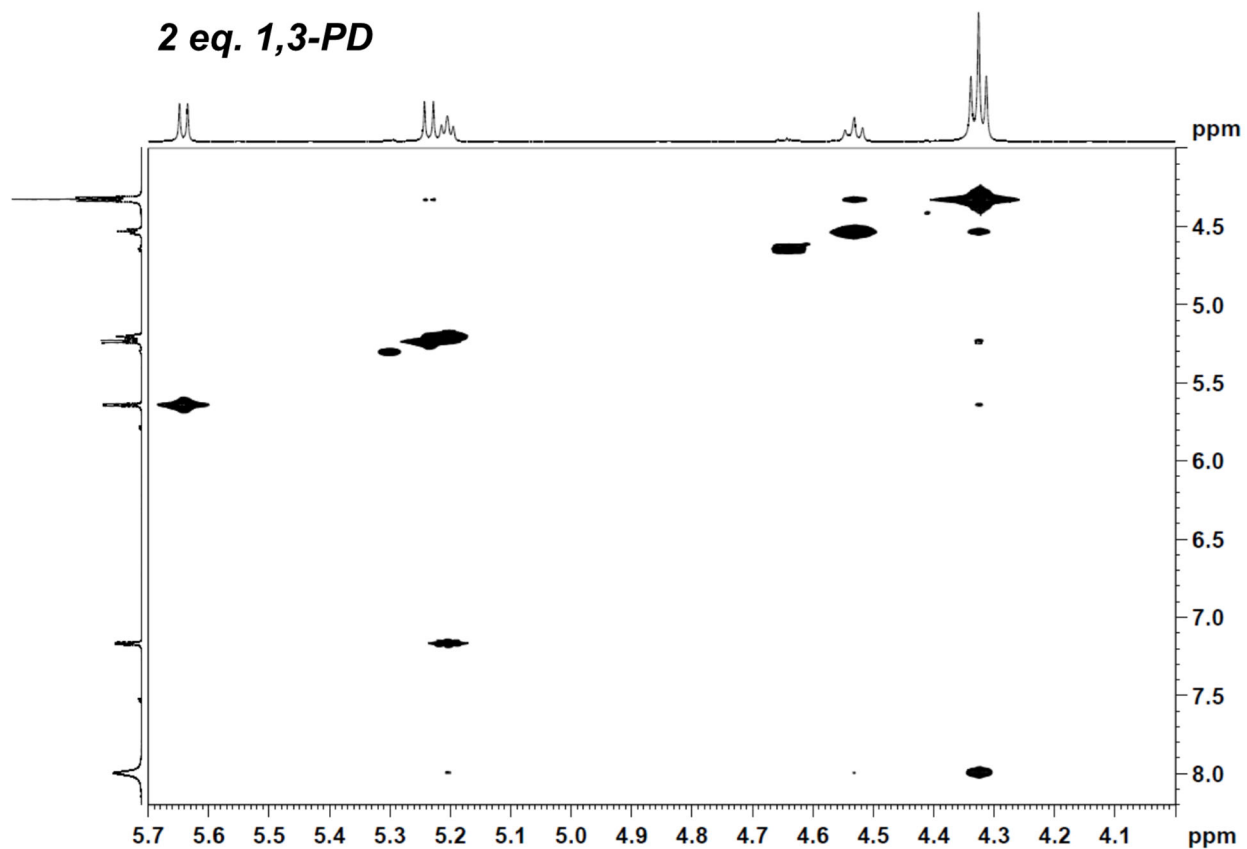

**Figure S7.** Full 2D NOESY spectra of 12.5 mM GlcN and 25 mM 1,3-PD in d<sub>6</sub>-DMSO recorded at 400 MHz (9.4 T). Full 1D NMR spectrum can be found in Figure S21.

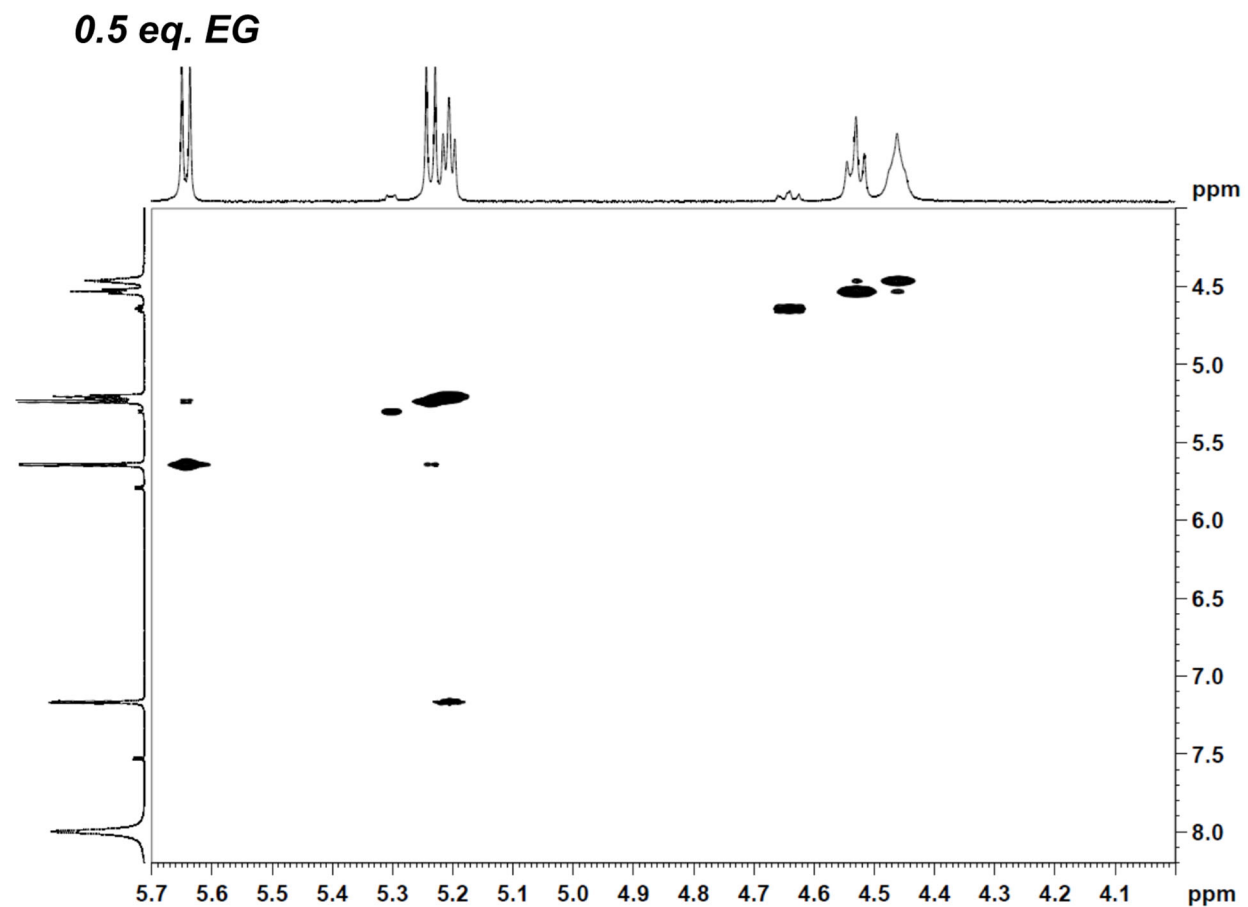

**Figure S8.** Full 2D NOESY spectra of 12.5 mM GlcN and 6.25 mM EG in d<sub>6</sub>-DMSO recorded at 400 MHz (9.4 T). Full 1D NMR spectrum can be found in Figure S22.



**1 eq. EG**

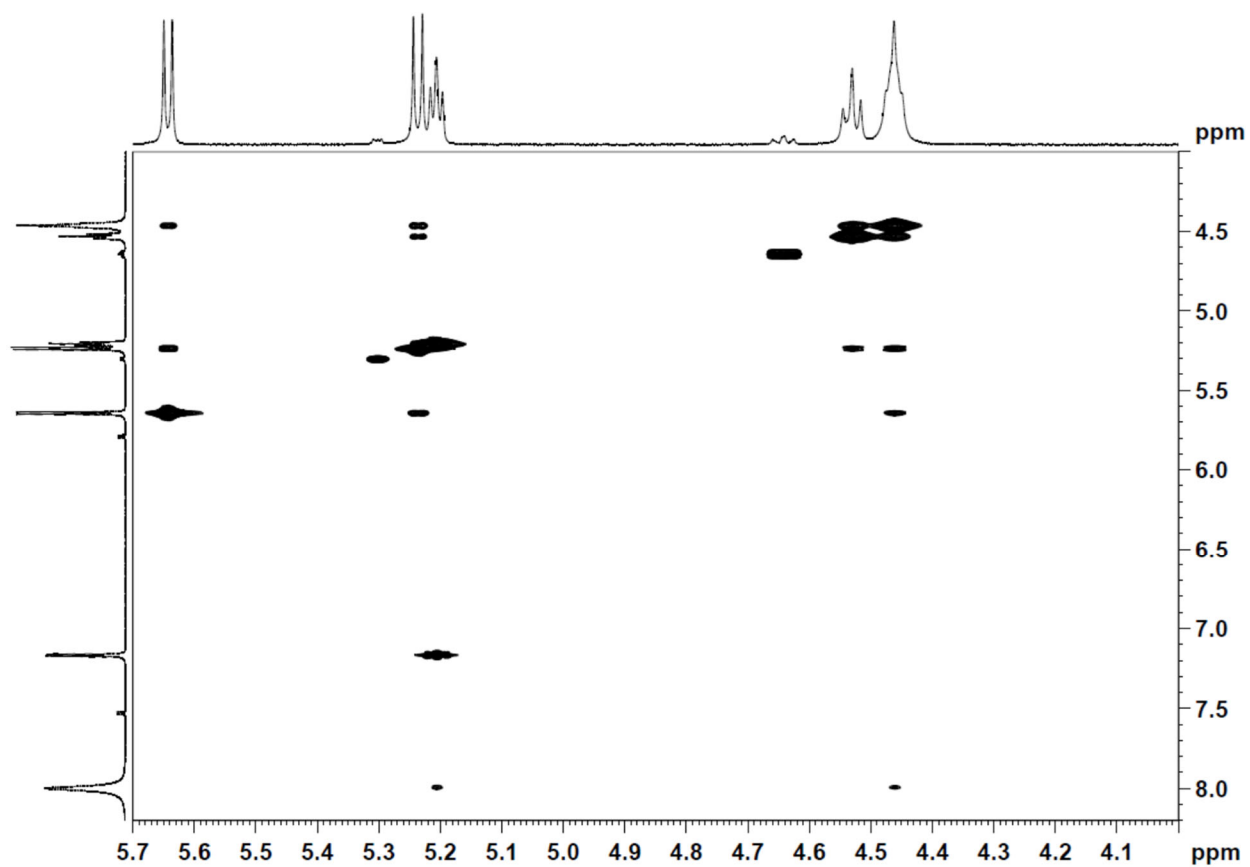

**Figure S9.** Full 2D NOESY spectra of 12.5 mM GlcN and 12.5 mM EG in d<sub>6</sub>-DMSO recorded at 400 MHz (9.4 T). Full 1D NMR spectrum can be found in Figure S23.

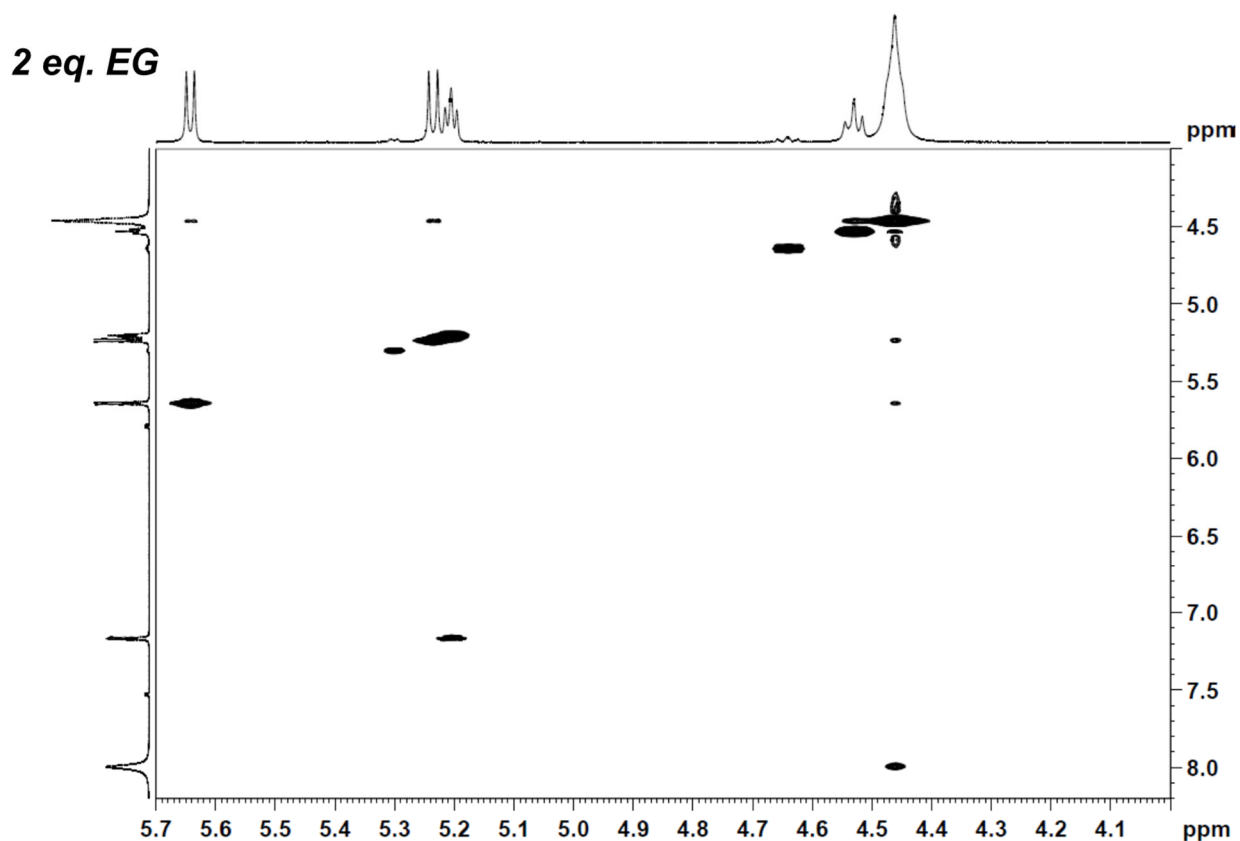

**Figure S10.** Full 2D NOESY spectra of 12.5 mM GlcN and 25 mM EG in d<sub>6</sub>-DMSO recorded at 400 MHz (9.4 T). Full 1D NMR spectrum can be found in Figure S24.

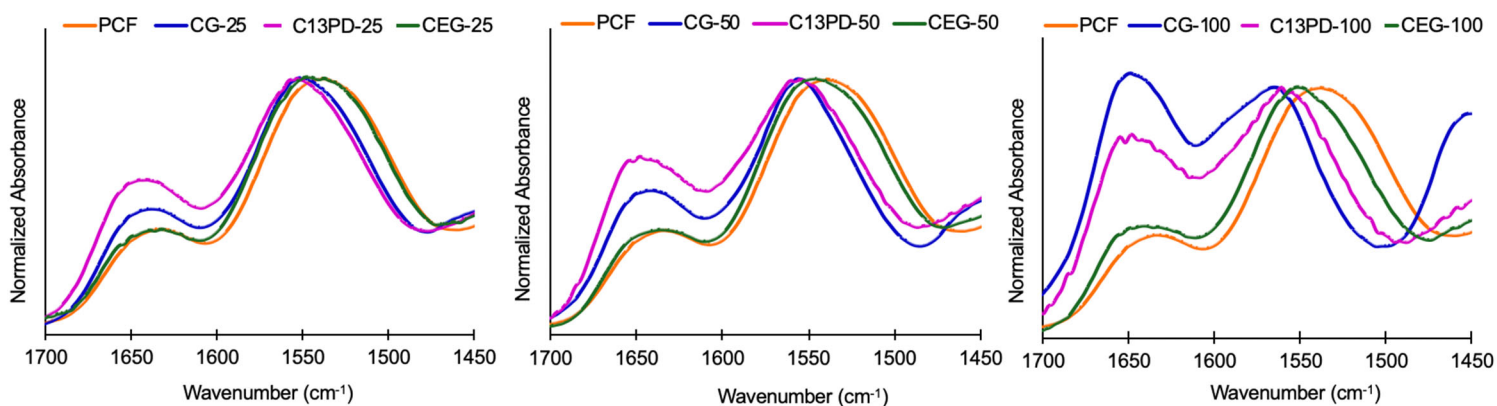

**Figure S11.** ATR-IR spectral overlay of CN/NH and CO-H combination band region from 1700 cm<sup>-1</sup>-1450 cm<sup>-1</sup> PCF (orange), CG (blue), C13PD (fuchsia), CEG (green) with increasing polyol concentration from 25 mM to 100 mM.

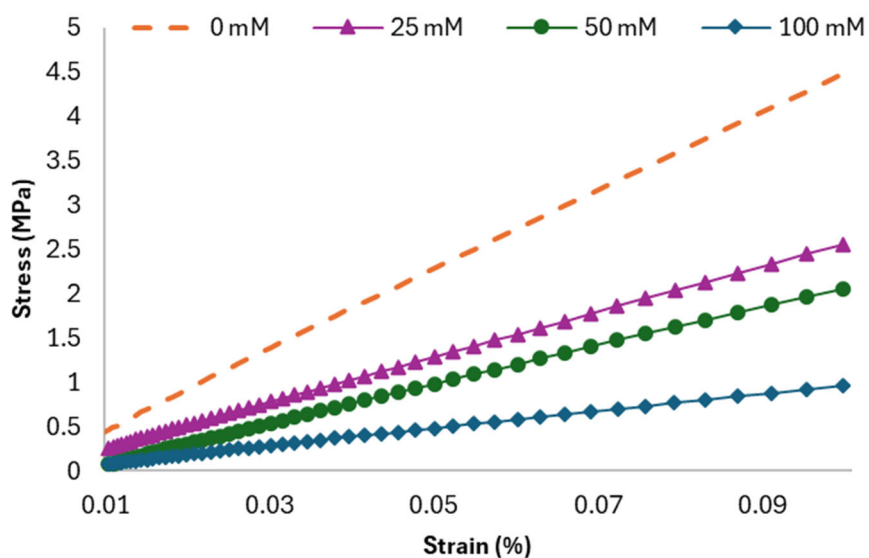

**Figure S12.** Stress-strain curves of 1% chitosan films with 0 mM (orange), 25 mM (pink), 50 mM (green) and 100 mM (blue) Glyc at 25 °C and 1 Hz.

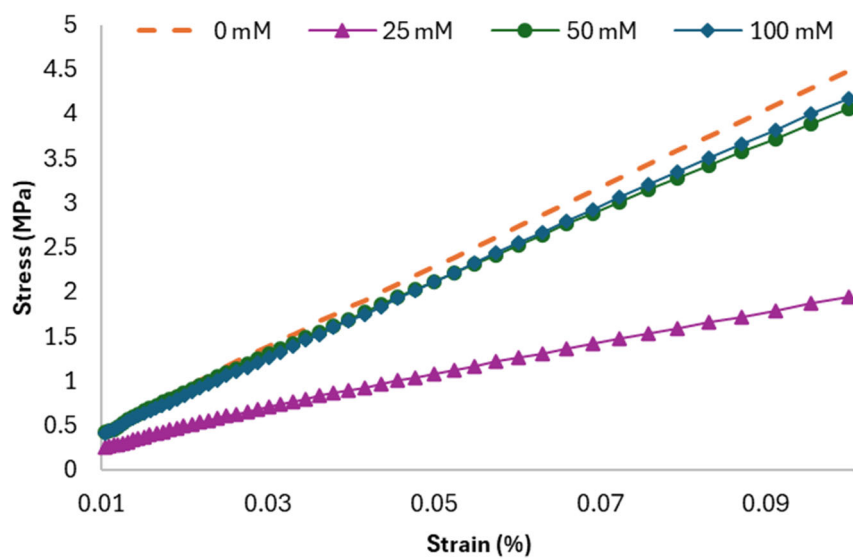

**Figure S13.** Stress-strain curves of 1% chitosan films with 0 mM (orange), 25 mM (pink), 50 mM (green) and 100 mM (blue) 1,3-PD at 25 °C and 1 Hz.

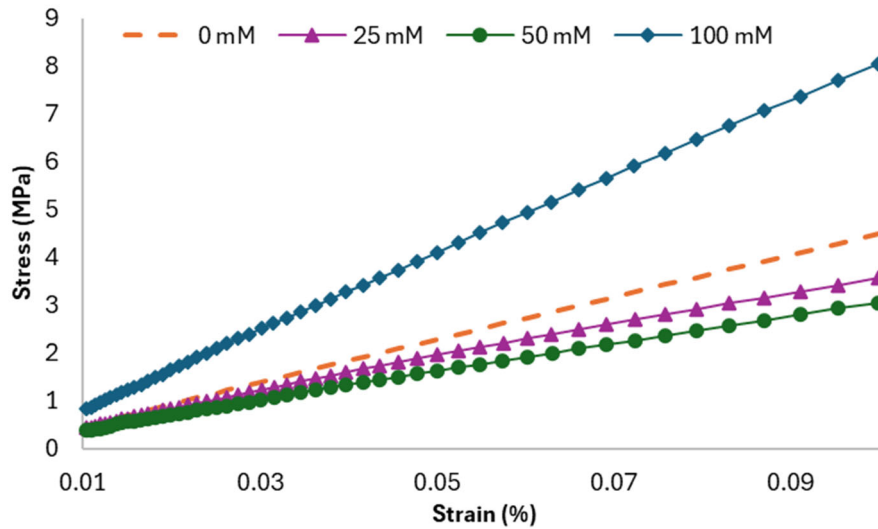

**Figure S14.** Stress-strain curves of 1% chitosan films with 0 mM (orange), 25 mM (pink), 50 mM (green) and 100 mM (blue) EG at 25 °C and 1 Hz.

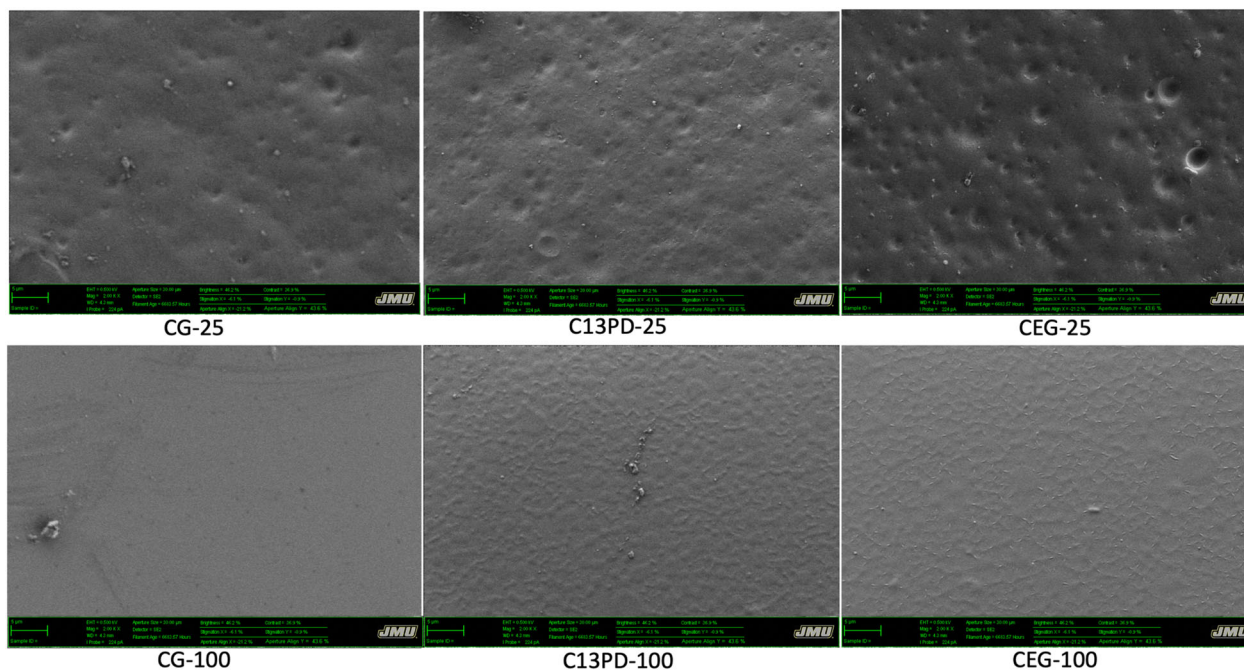

**Figure S15.** SEM surface morphologies of 1% chitosan films at 25 and 100 mM Glyc (CG-25 and CG-100), 1,3-PD (C13PD-25 and C13PD-100) and EG (CEG-25 and CEG-100).

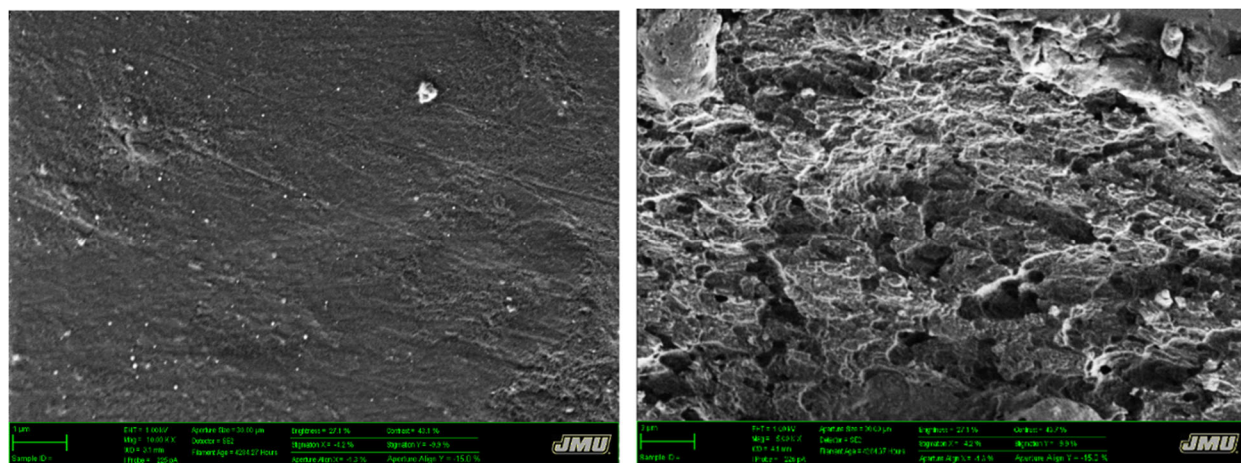

**Figure S16.** SEM surface (left) and cross-sectional (right) morphologies of 1% chitosan films.

| Film        | T <sub>H20</sub> (°C) | WL (%) | T <sub>max</sub> (°C) | ML (%) |
|-------------|-----------------------|--------|-----------------------|--------|
| CG-25       | 21.9                  | 10.7   | 246.5                 | 48.2   |
| CG-50       | 21.9                  | 10.9   | 246.1                 | 40.0   |
| CG-100      | 23.1                  | 11.2   | 255.6                 | 42.8   |
| C13PD-25    | 20.3                  | 10.3   | 243.9                 | 47.4   |
| C13PD-50    | 21.6                  | 9.9    | 247.9                 | 46.8   |
| C13PD-100   | 21.9                  | 9.7    | 250.2                 | 46.7   |
| C2M13PD-25  | 20.3                  | 10.4   | 244.1                 | 49.8   |
| C2M13PD -50 | 20.3                  | 9.6    | 241.9                 | 49.6   |
| C2M13PD-100 | 24.1                  | 9.3    | 245.5                 | 51.2   |
| CEG-25      | 34.4                  | 8.2    | 245.6                 | 48.4   |
| CEG-50      | 37.6                  | 8.5    | 247.5                 | 47.6   |
| CEG-100     | 37.7                  | 8.4    | 248.0                 | 47.3   |
| C12PD-25    | 34.7                  | 7.4    | 242.4                 | 53.7   |
| C12PD-50    | 20.7                  | 8.0    | 239.9                 | 53.2   |
| C12PD-100   | 35.2                  | 7.7    | 245.7                 | 50.9   |

**Table S1:** TGA of the films containing different polyols at 25 mM, 50 mM and 100 mM. Values for water loss temperature and mass percent loss (T<sub>H20</sub>, °C and WL, %) and maximum mass loss temperature and mass percent loss (T<sub>max</sub>, °C, ML, %) are given.

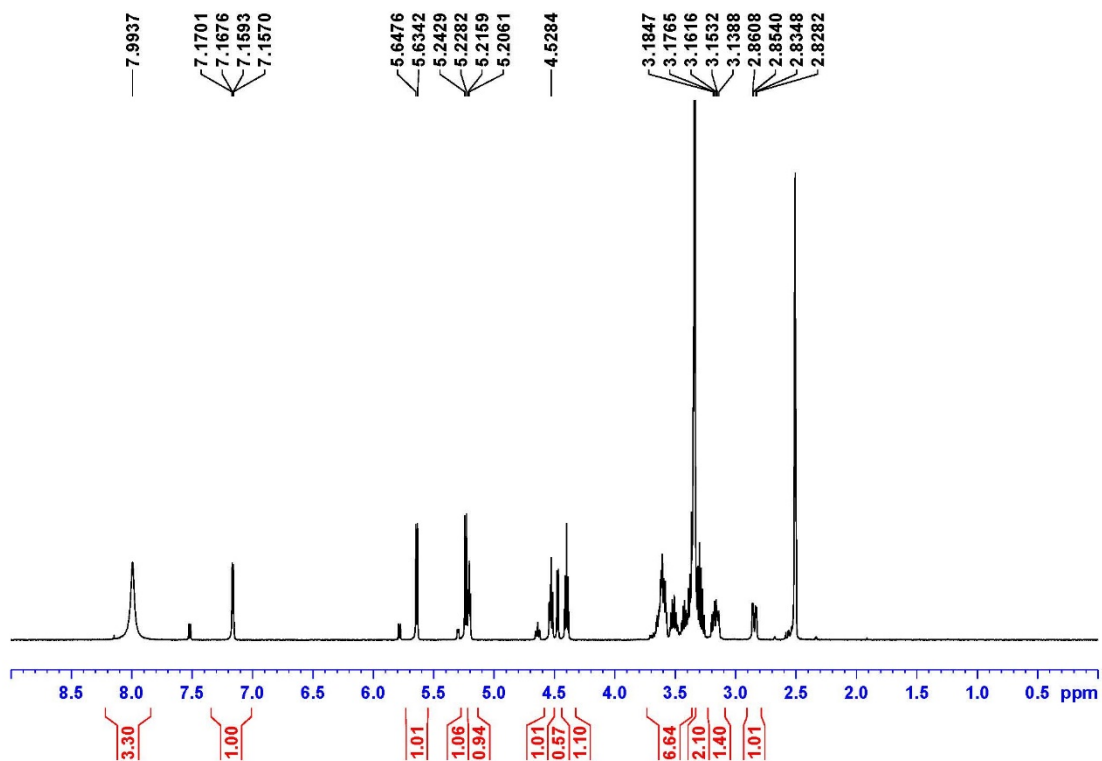

**Figure S17.** Full 1D NMR spectra of 12.5 mM GlcN and 6.25 mM Glyc in d<sub>6</sub>-DMSO recorded at 400 MHz (9.4 T).

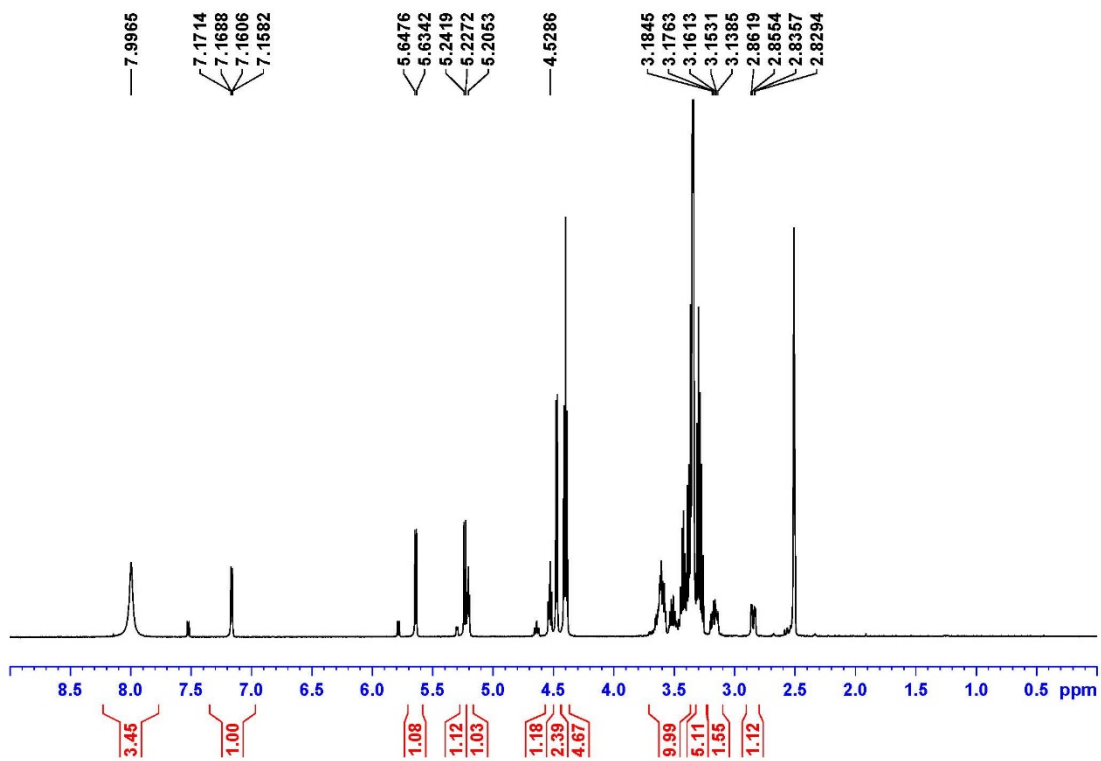

**Figure S18.** Full 1D NMR spectra of 12.5 mM GlcN and 25 mM Glyc in d<sub>6</sub>-DMSO recorded at 400 MHz (9.4 T).

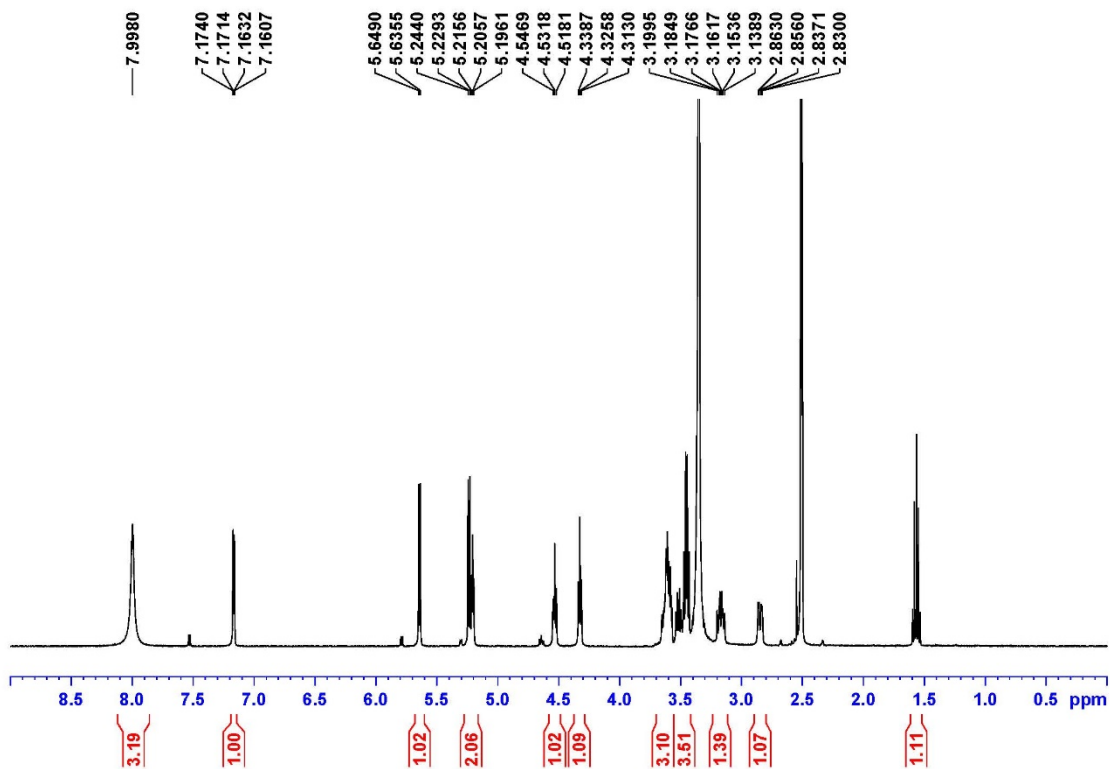

**Figure S19.** Full 1D NMR spectra of 12.5 mM GlcN and 6.25 mM 1,3-PD in d<sub>6</sub>-DMSO recorded at 400 MHz (9.4 T).



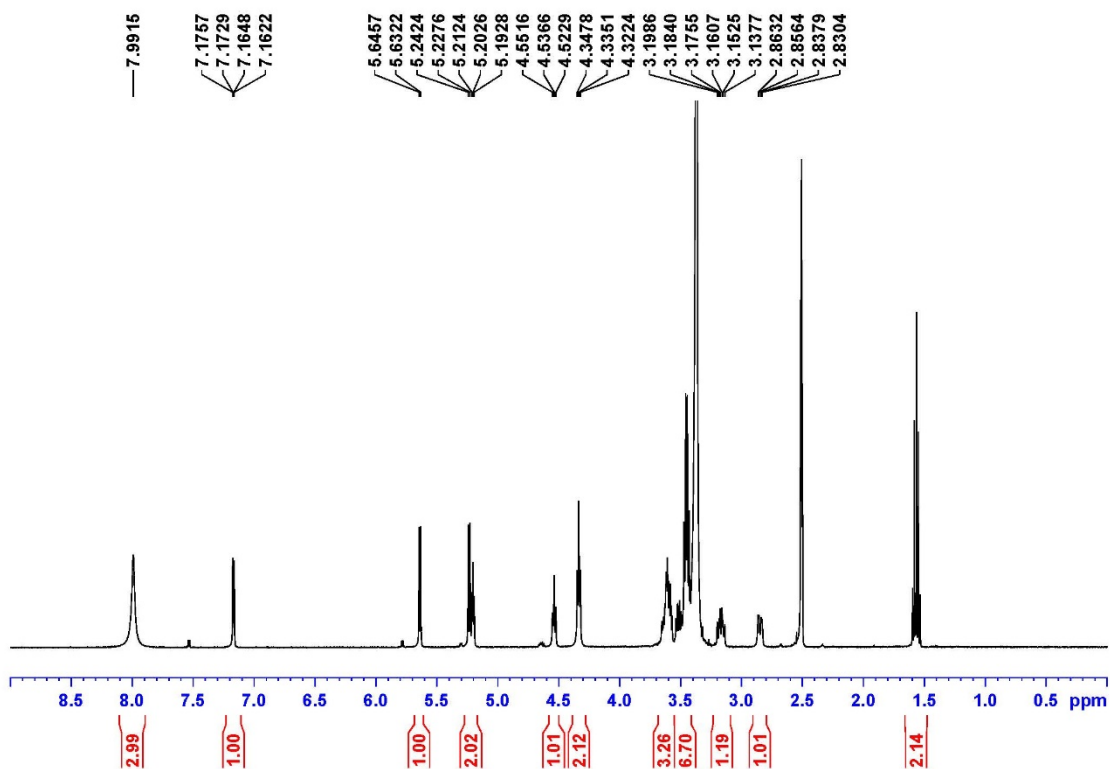

**Figure S20.** Full 1D NMR spectra of 12.5 mM GlcN and 12.5 mM 1,3-PD in d<sub>6</sub>-DMSO recorded at 400 MHz (9.4 T).

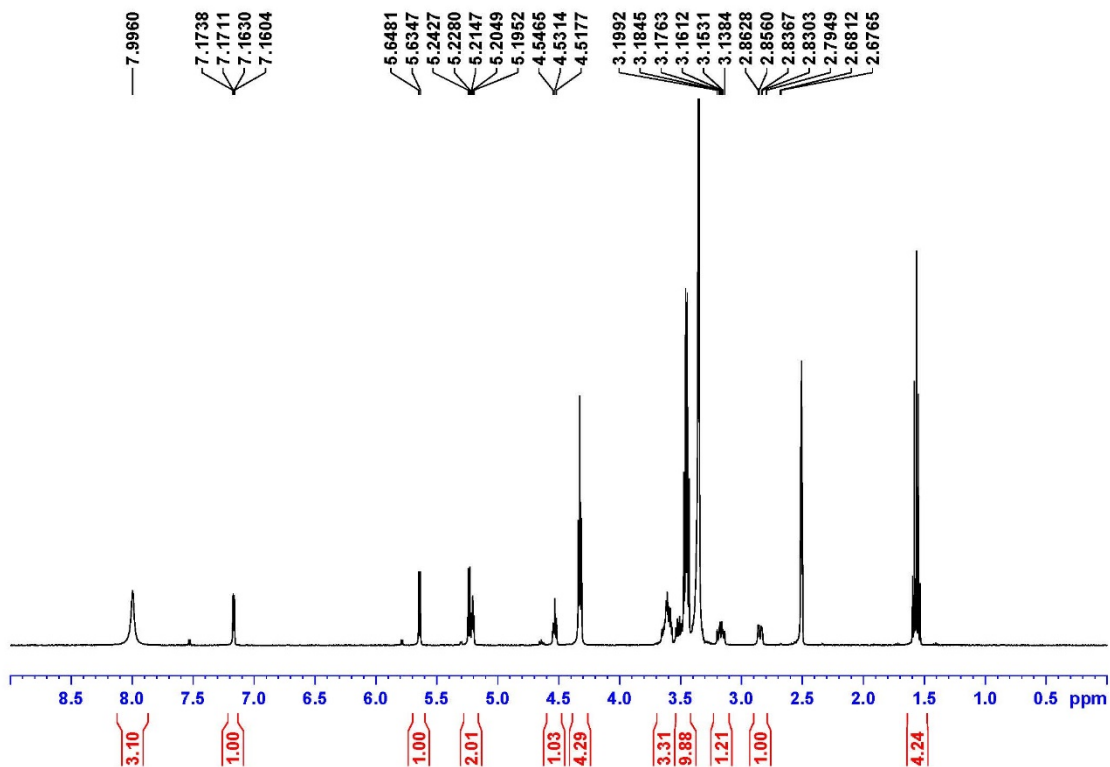

**Figure S21.** Full 1D NMR spectra of 12.5 mM GlcN and 25 mM 1,3-PD in d<sub>6</sub>-DMSO recorded at 400 MHz (9.4 T).

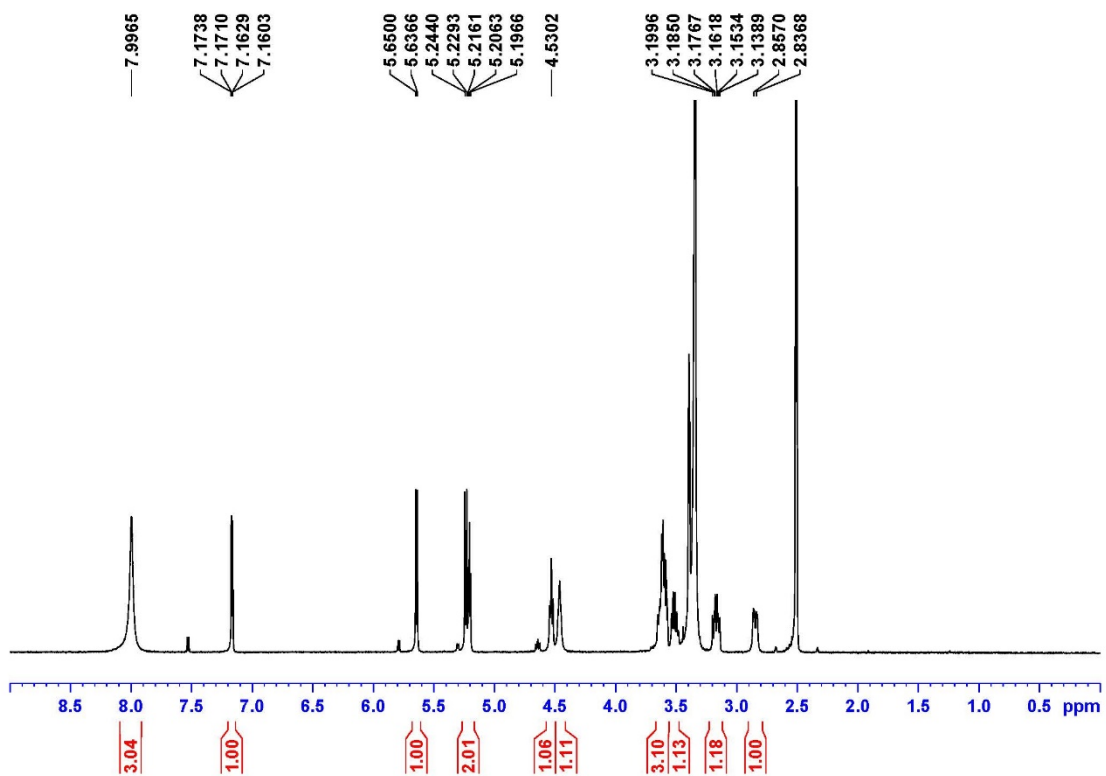

**Figure S22.** Full 1D NMR spectra of 12.5 mM GlcN and 6.25 mM EG in d<sub>6</sub>-DMSO recorded at 400 MHz (9.4 T).

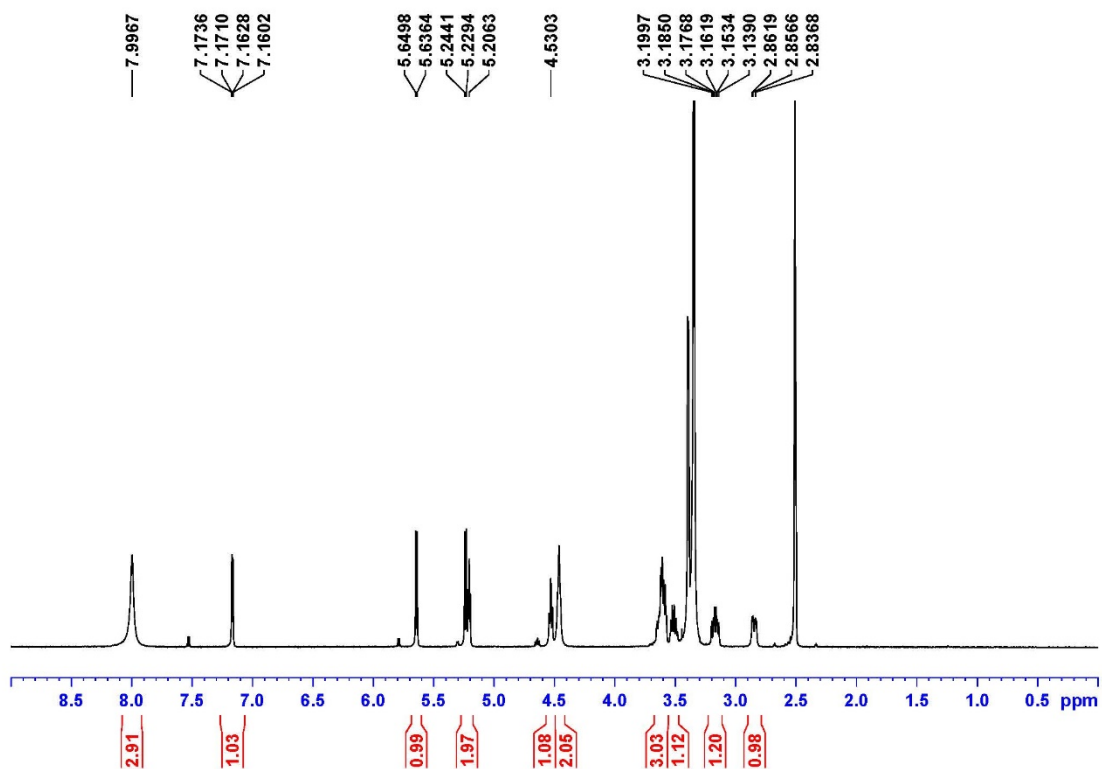

**Figure S23.** Full 1D NMR spectra of 12.5 mM GlcN and 12.5 mM EG in d<sub>6</sub>-DMSO recorded at 400 MHz (9.4 T).

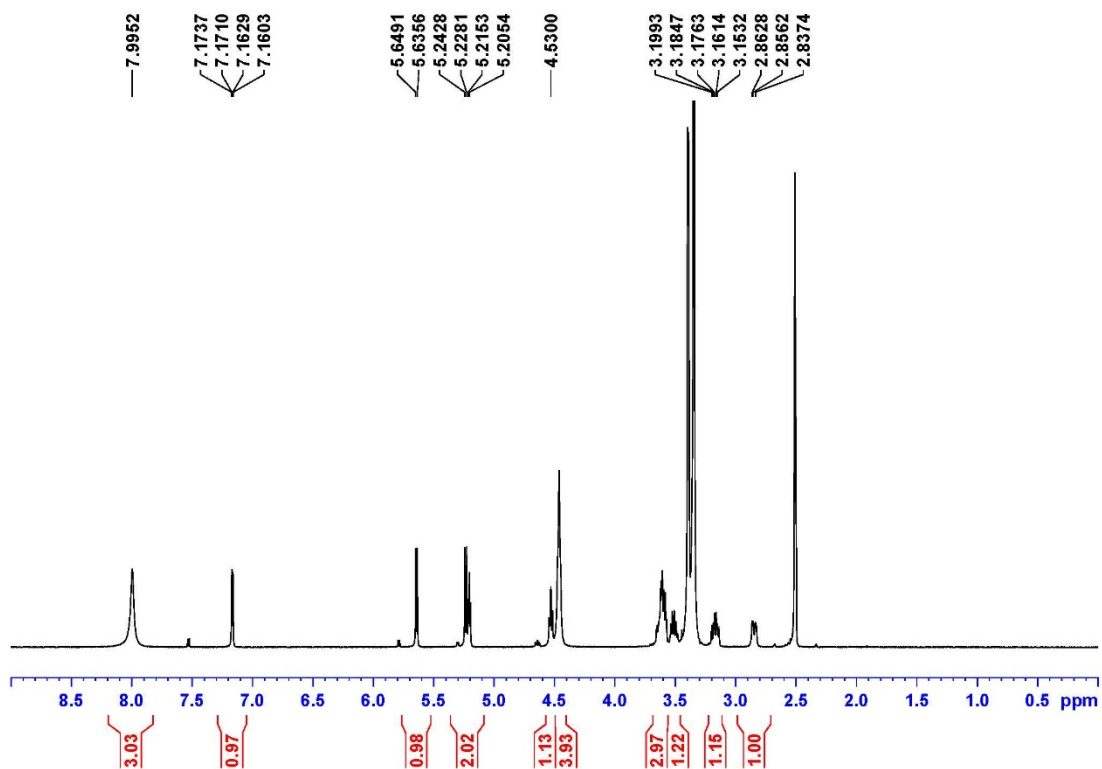

**Figure S24.** Full 1D NMR spectra of 12.5 mM GlcN and 25 mM EG in d<sub>6</sub>-DMSO recorded at 400 MHz (9.4 T).
